# Supplementary material for: Metabolic response patterns in brain microdialysis fluids and serum during interstitial cisplatin treatment of high-grade glioma
Source: PubMed Central journal article supplement (PMC7052137; doi:10.1038/s41416-019-0652-x), 2019-12-10
Supplement: 41416_2019_652_MOESM1_ESM.pdf [file 41416_2019_652_MOESM1_ESM.pdf]

**Supplementary table 1.** Metabolites identified in microdialysis fluid collected from high-grade gliomas.

| Metabolite                                                             | RSD% <sup>a</sup> | NIST match <sup>b</sup> |
|------------------------------------------------------------------------|-------------------|-------------------------|
| <b>CARBOHYDRATES</b>                                                   |                   |                         |
| KETOHEXOSE MIX 1 (FRUCTOSE/SORBOSE/TAGATOSE/PSICOSE)                   | 3.8               | 963                     |
| KETOHEXOSE MIX 2 (FRUCTOSE/SORBOSE/TAGATOSE/PSICOSE)                   | 2.9               | 947                     |
| ALDOHEXOSE MIX 1 (GALACTOSE/GULOSE/ALLOSE)                             | 2.0               | 932                     |
| ALDOHEXOSE MIX 2 (GLUCOSE/GALACTOSE/MANNOSE/IDOSE/ALTROSE)             | 1.9               | 924                     |
| ALDOHEXOSE MIX 3 (GLUCOSE/GALACTOSE/MANNOSE)                           | 1.8               | 935                     |
| ALDOPENTOSE MIX (XYLOSE/LYXOSE/ARABINOSE/RIBOSE)                       | 4.2               | 923                     |
| DISACCHARIDE MIX 1 (CELLOBIOSE/LAMINARIBIOSE/MALTOSE/TURANOSE)         | 11.5              | 865                     |
| DISACCHARIDE MIX 2 (MALTOSE/LAMINARIBIOSE/TURANOSE/SAKEBIOSE/LACTITOL) | 40.6              | 835                     |
| DISACCHARIDE MIX 3 (MALTOSE/LAMINARIBIOSE/TURANOSE/SAKEBIOSE/LACTITOL) | 25.8              | 804                     |
| XYLULOSE                                                               | 10.0              | 755                     |
| ERYTHROSE                                                              | 24.2              | 784                     |
| FUCOSE/RHAMNOSE                                                        | 11.1              | 852                     |
| GLYCERO-GULO-HEPTOSE                                                   | 31.0              | 732                     |
| ISOMALTOSE                                                             | 51.0              | 881                     |
| LACTOSE/LACTULOSE                                                      | 28.0              | 904                     |
| PALATINOSE                                                             | 42.0              | 667                     |
| SUCROSE                                                                | 17.1              | 859                     |
| TALOFURANOSE, ETHER                                                    | 79.8              | 830                     |
| TREHALOSE, ALPHA,ALPHA'                                                | 70.1              | 811                     |
| <b>AMINOACIDS</b>                                                      |                   |                         |
| ALANINE                                                                | 4.7               | 935                     |
| ARGININE                                                               | 18.1              | 947                     |
| ASPARAGINE                                                             | 13.7              | 881                     |
| BETA-ALANINE                                                           | 4.5               | 837                     |
| BETA-CYANO-L-ALANINE                                                   | 18.2              | 804                     |
| CITRULLINE (ORNTHINE)                                                  | 2.0               | 864                     |
| CREATININE                                                             | 34.2              | 935                     |
| CYSTATHIONINE                                                          | 38.0              | 922                     |
| CYSTEINE                                                               | 15.9              | 872                     |
| CYSTINE                                                                | 38.9              | 904                     |
| GLUTAMIC ACID                                                          | 1.0               | 941                     |
| GLUTAMINE                                                              | 25.7              | 935                     |
| GLYCINE                                                                | 2.1               | 948                     |
| GUANOSINE                                                              | 74.5              | 785                     |
| HISTIDINE                                                              | 17.1              | 785                     |
| HYPOXANTHINE                                                           | 11.6              | 921                     |
| INOSINE                                                                | 54.2              | 788                     |
| ISOLEUCINE                                                             | 2.9               | 947                     |
| LEUCINE                                                                | 3.1               | 931                     |
| LYSINE                                                                 | 2.0               | 906                     |

|                |      |     |
|----------------|------|-----|
| ORNITHINE      | 2.7  | 930 |
| PHENYLALANINE  | 2.3  | 948 |
| PROLINE        | 1.5  | 945 |
| PROLINE [+CO2] | 35.7 | 899 |
| SERINE         | 2.6  | 960 |
| THREONINE      | 1.7  | 960 |
| TRYPTOPHAN     | 19.1 | 927 |
| TYROSINE       | 2.7  | 950 |
| VALINE         | 3.6  | 954 |

#### ACIDS

|                                            |      |     |
|--------------------------------------------|------|-----|
| 2-AMINOBUTYRIC ACID                        | 3.8  | 938 |
| AMINOMALONIC ACID                          | 20.8 | 851 |
| ASCORBIC ACID                              | 13.8 | 834 |
| N-ACETYL-L-ASPARTIC ACID                   | 5.6  | 899 |
| BENZOIC ACID                               | 8.2  | 870 |
| CITRIC ACID                                | 3.7  | 939 |
| DEHYDROASCORBIC ACID DIMER                 | 9.7  | 861 |
| 2,3-DIHYDROXYBUTANOIC ACID                 | 9.8  | 927 |
| 3,4-DIHYDROXYPHENYLACETIC ACID             | 35.9 | 824 |
| ERYTHRONIC/THREONIC ACID                   | 4.4  | 937 |
| GALACTURONIC ACID                          | 16.4 | 740 |
| GALACTURONIC ACID                          | 3.3  | 715 |
| GLUCOHEPTONIC ACID                         | 51.7 | 696 |
| GLUCONIC ACID                              | 28.6 | 784 |
| GLUCURONIC ACID                            | 24.3 | 668 |
| GLUTARIC ACID                              | 37.1 | 859 |
| GLUTARIC ACID, 2-HYDROXY-                  | 7.5  | 927 |
| GLYCERIC ACID                              | 3.2  | 968 |
| GLYCOLIC ACID                              | 14.2 | 701 |
| GLUCONIC ACID-1,5-LACTONE                  | 2.4  | 722 |
| HEXADECANOIC ACID                          | 5.6  | 813 |
| DL-ALPHA-HYDROXYBUTYRIC ACID               | 3.8  | 946 |
| 3-HYDROXYBUTYRIC ACID                      | 5.3  | 923 |
| 2-HYDROXY-3-METHYLBUTYRIC ACID, DERIVATIVE | 5.6  | 761 |
| ISOCITRIC ACID                             | 10.7 | 906 |
| ALPHA-KETOGLUTARIC ACID                    | 6.6  | 903 |
| LACTIC ACID                                | 3.3  | 992 |
| MALIC ACID                                 | 5.1  | 943 |
| NONANOIC ACID                              | 5.2  | 813 |
| OCTADECENOIC ACID, 9-(E)                   | 14.9 | 801 |
| OCTADECANOIC ACID                          | 3.2  | 933 |
| 2-OXOISOCAPROIC ACID                       | 4.6  | 882 |
| PYROGLUTAMIC ACID                          | 8.6  | 953 |
| SHIKIMIC ACID                              | 34.2 | 745 |
| URIC ACID                                  | 16.0 | 945 |

| <b>ALCOHOLS</b>                                           |      |     |
|-----------------------------------------------------------|------|-----|
| 5-CARBON SUGAR ALCOHOL MIX (XYLITOL/ARABITOL/RIBITOL)     | 5.5  | 935 |
| 6-CARBON SUGAR ALCOHOL MIX (MANNITOL/SORBITOL/GALACTITOL) | 5.9  | 942 |
| ERYTHRITOL                                                | 3.9  | 959 |
| 1,5-ANHYDRO-D-GLUCITOL                                    | 2.2  | 935 |
| GLYCEROL                                                  | 3.8  | 856 |
| IDITOL                                                    | 15.5 | 772 |
| MALTITOL                                                  | 35.9 | 796 |
| PALATINITOL                                               | 57.5 | 885 |
| THREITOL                                                  | 7.4  | 850 |
| <b>AMINES</b>                                             |      |     |
| N-ACETYL GLUCOSAMINE                                      | 19.8 | 849 |
| N-ACETYL MANNOSAMINE                                      | 4.7  | 777 |
| ETHANOLAMINE                                              | 10.2 | 856 |
| GLUTAMINE                                                 | 19.0 | 951 |
| O-PHOSPHOETANOLAMINE                                      | 45.9 | 746 |
| SPERMIDINE                                                | 11.8 | 931 |
| <b>MISCELLANEOUS</b>                                      |      |     |
| ACETAMINOPHEN (PARACETAMOL)*                              | 36.2 | 934 |
| ACETAMINOPHEN GLUCURONIDE (METABOLITE OF PARACETAMOL)*    | 94.4 | 891 |
| BUTYLATED HYDROXYTOLUENE, DERIVATIVE                      | 10.8 | 845 |
| 5,6-DIHYDROURACIL                                         | 16.4 | 954 |
| GLYCEROL-3-PHOSPHATE                                      | 35.4 | 819 |
| INOSITOL, CHIRO                                           | 8.1  | 948 |
| INOSITOL, MYO                                             | 2.6  | 946 |
| INOSITOL, SCYLLO                                          | 6.7  | 916 |
| KYNURENINE                                                | 15.4 | 851 |
| PHOSPHATE (PHOSPHATE-FRAGMENT)                            | 6.0  | 924 |
| PUTRESCINE                                                | 8.1  | 863 |
| URACIL                                                    | 11.8 | 876 |
| UREA                                                      | 7.6  | 951 |

<sup>a</sup>RSD%, calculated relative standard deviation percent for the quantified metabolite in QC samples.

<sup>b</sup>NIST match factor, numeric value (1-999) indicating the similarity of the resolved spectrum to the library spectrum.

\*pharmaceutical drug

**Supplementary table 2.** Metabolites identified in serum collected from high-grade gliomas.

| Metabolite                                                              | RSD% <sup>a</sup> | NIST match <sup>b</sup> |
|-------------------------------------------------------------------------|-------------------|-------------------------|
| <b>CARBOHYDRATES</b>                                                    |                   |                         |
| ALDOHEXOSE MIX 1 (GALACTOSE/GULOSE/ALLOSE)                              | 0.5               | 935                     |
| ALDOHEXOSE MIX 2 (GLUCOSE/GALACTOSE/MANNOSE/IDOSE/ALTROSE)              | 2.9               | 942                     |
| ALDOHEXOSE MIX 3 (GLUCOSE/GALACTOSE/MANNOSE/ALTROSE/TALOSE/GULOSE)      | 3.8               | 945                     |
| ALDOPENTOSE MIX 1 (XYLOSE/LYXOSE)                                       | 16.2              | 900                     |
| ALDOPENTOSE MIX 2 (ARABINOSE/RIBOSE)                                    | 2.7               | 899                     |
| DISACCHARIDE MIX 1 (CELLOBIOSE/LAMINARIBIOSE/MALTOSE/TURANOSE)          | 10.3              | 837                     |
| DISACCHARIDE MIX 2 (MALTOSE/LAMINARIBIOSE/TURANOSE/SAKEBIOSE /LACTITOL) | 9.4               | 872                     |
| FUCOSE/RHAMNOSE                                                         | 8.3               | 824                     |
| ISOMALTOSE                                                              | 4.7               | 930                     |
| KETOHEXOSE MIX 1 (FRUCTOSE/SORBOSE/TAGATOSE/PSICOSE)                    | 4.7               | 936                     |
| KETOHEXOSE MIX 2 (FRUCTOSE/SORBOSE/TAGATOSE/PSICOSE)                    | 4.1               | 833                     |
| LACTOSE                                                                 | 20.3              | 794                     |
| MELIBIOSE                                                               | 28.8              | 852                     |
| RIBOSE                                                                  | 8.9               | 841                     |
| TALOFURANOSE, ETHER                                                     | 54.3              | 832                     |
| SAKEBIOSE                                                               | 27.6              | 784                     |
| SUCROSE                                                                 | 11.1              | 861                     |
| <b>AMINO ACIDS</b>                                                      |                   |                         |
| ALANINE                                                                 | 3.1               | 918                     |
| BETA-ALANINE                                                            | 14.6              | 722                     |
| ASPARAGINE                                                              | 4.0               | 929                     |
| CITRULLINE (ORNITHINE)                                                  | 8.4               | 907                     |
| ARGININE                                                                | 4.5               | 921                     |
| ASPARAGINE                                                              | 8.0               | 820                     |
| ASPARAGINE [-H2O]                                                       | 4.8               | 867                     |
| CREATININE                                                              | 8.0               | 952                     |
| CYSTATHIONINE                                                           | 15.1              | 706                     |
| CYSTEINE                                                                | 4.5               | 873                     |
| CYSTINE                                                                 | 10.3              | 944                     |
| GLUTAMIC ACID                                                           | 3.2               | 933                     |
| GLUTAMINE                                                               | 36.5              | 947                     |
| GLYCINE                                                                 | 5.4               | 946                     |
| HISTIDINE                                                               | 8.1               | 867                     |
| METHYL HISTIDINE                                                        | 19.2              | 745                     |
| HYPOXANTHINE                                                            | 6.3               | 901                     |
| INOSINE                                                                 | 9.6               | 917                     |
| ISOLEUCINE                                                              | 2.3               | 879                     |
| KYNURENINE                                                              | 15.7              | 874                     |
| LEUCINE                                                                 | 4.2               | 902                     |
| LYSINE                                                                  | 2.6               | 938                     |
| METHIONINE                                                              | 1.0               | 829                     |

|                           |      |     |
|---------------------------|------|-----|
| PHENYLALANINE             | 1.8  | 943 |
| ORNITHINE                 | 4.8  | 925 |
| PROLINE                   | 3.2  | 926 |
| PROLINE [+CO2]            | 17.2 | 875 |
| TRANS-4-HYDROXY-L-PROLINE | 4.1  | 869 |
| SERINE                    | 15.3 | 960 |
| TAURINE                   | 10.4 | 921 |
| THREONINE                 | 3.8  | 966 |
| TRYPTOPHAN                | 1.6  | 929 |
| TYROSINE                  | 2.2  | 953 |
| VALINE                    | 2.1  | 910 |

#### ACIDS

|                                            |      |     |
|--------------------------------------------|------|-----|
| ADIPIC ACID                                | 10.9 | 721 |
| 2-AMINOBUTYRIC ACID                        | 2.7  | 935 |
| ASPARTIC ACID                              | 29.5 | 883 |
| DOCOSAPENTAENOIC ACID                      | 5.6  | 866 |
| DOCOSAHEXAENOIC ACID                       | 5.4  | 897 |
| DODECANOIC ACID                            | 5.2  | 806 |
| ERYTHRONIC ACID                            | 4.7  | 868 |
| FUMARIC ACID                               | 32.2 | 896 |
| GALACTURONIC ACID                          | 8.7  | 749 |
| GLYCERIC ACID                              | 2.5  | 922 |
| HEPTADECENOIC ACID, CIS-10-                | 8.4  | 913 |
| HEPTADECANOIC ACID                         | 6.3  | 919 |
| HEXADECANOIC ACID                          | 5.7  | 916 |
| HEXANOIC ACID                              | 14.9 | 785 |
| 2,3-DIHYDROXYBUTANOIC ACID (ISOMER 1)      | 4.7  | 941 |
| 2,3-DIHYDROXYBUTANOIC ACID (ISOMER 2)      | 3.3  | 927 |
| DL-ALPHA-HYDROXYBUTYRIC ACID               | 4.2  | 955 |
| 3-HYDROXYBUTYRIC ACID                      | 3.1  | 822 |
| 4-HYDROXYPHENYLACETIC ACID                 | 18.1 | 749 |
| 2-ETHYL-3-HYDROXYPROPIONIC ACID, DI-       | 19.8 | 789 |
| EICOSADIENOIC ACID, CIS-11,14-             | 15.3 | 824 |
| EICOSANOIC ACID                            | 24.0 | 650 |
| EICOSAPENTAENOIC ACID                      | 8.1  | 831 |
| EICOSATETRAENOIC ACID, 5,8,11,14-(Z,Z,Z,Z) | 5.4  | 933 |
| EIOCOSENOIC ACID, CIS-11-                  | 14.7 | 886 |
| GALACTONIC ACID                            | 40.2 | 862 |
| GLUCONIC ACID                              | 20.3 | 862 |
| ALPHA-KETOGLUTARIC ACID                    | 3.5  | 813 |
| LACTIC ACID                                | 1.5  | 920 |
| MALIC ACID                                 | 1.9  | 919 |
| MYRISTIC ACID                              | 2.7  | 826 |
| MYRISTOLEIC ACID                           | 2.5  | 895 |
| NONANOIC ACID                              | 11.4 | 732 |

|                                  |      |     |
|----------------------------------|------|-----|
| OCTADECANOIC ACID                | 7.2  | 943 |
| OCTADECENOIC ACID,-9-(Z)         | 2.3  | 921 |
| OCTADECADIENOIC ACID, 9,12-(Z,Z) | 5.0  | 905 |
| 2-OXOISOCAPROIC ACID             | 2.3  | 900 |
| PENTADECANOIC ACID               | 9.0  | 780 |
| PALMITOLEIC ACID                 | 2.2  | 953 |
| PIPECOLIC ACID                   | 4.1  | 835 |
| PYROGLUTAMIC ACID                | 20.5 | 890 |
| PYROPHOSPHORIC ACID              | 2.1  | 923 |
| PYRUVIC ACID                     | 5.6  | 777 |
| SACCHARIC ACID                   | 16.8 | 821 |
| THREONIC ACID                    | 3.8  | 937 |
| URIC ACID                        | 2.9  | 942 |

#### ALCOHOLS AND STEROLS

|                                                           |      |     |
|-----------------------------------------------------------|------|-----|
| 5-CARBON SUGAR ALCOHOL MIX 1 (ARABITOL/RIBITOL)           | 5.4  | 914 |
| 5-CARBON SUGAR ALCOHOL MIX 2 (XYLITOL/ARABITOL)           | 3.4  | 927 |
| 6-CARBON SUGAR ALCOHOL MIX (MANNITOL/SORBITOL/GALACTITOL) | 4.0  | 922 |
| CAMPESTEROL                                               | 16.2 | 926 |
| CHOLESTEROL                                               | 0.8  | 909 |
| ERYTHRITOL                                                | 2.5  | 939 |
| GLYCEROL                                                  | 5.8  | 918 |
| GLYCEROL-3-PHOSPHATE                                      | 6.4  | 917 |
| 1,5-ANHYDRO-D-GLUCITOL                                    | 0.6  | 928 |
| IDITOL                                                    | 6.6  | 787 |
| BETA-SITOSTEROL                                           | 10.9 | 898 |
| GAMMA-TOCOPHEROL                                          | 5.3  | 862 |
| THREITOL                                                  | 3.8  | 922 |
| ALPHA-TOCOPHEROL                                          | 6.5  | 904 |

#### AMINES

|                      |      |     |
|----------------------|------|-----|
| N-ACETYL MANNOSAMINE | 7.3  | 689 |
| ETHANOLAMINE         | 3.5  | 919 |
| O-PHOSPHOETANOLAMINE | 22.6 | 843 |

#### MISCELLANEOUS

|                                                                  |      |     |
|------------------------------------------------------------------|------|-----|
| ACETAMINOPHEN (PARACETAMOL)*                                     | 7.3  | 949 |
| ACETAMINOPHEN GLUCURONIDE (METABOLITE OF PARACETAMOL)*           | 3.8  | 903 |
| CITRIC ACID                                                      | 1.5  | 932 |
| DOCOSAHEXAENOIC ACID METHYL ESTER, 4,7,10,13,16,19-(Z,Z,Z,Z,Z,Z) | 15.8 | 769 |
| GALACTOPYRANOSIDE, 1-O-METHYL-, BETA-D-                          | 5.3  | 747 |
| GLYCERO-GULO-HEPTOSE                                             | 15.8 | 800 |
| GUANOSINE                                                        | 47.8 | 695 |
| HEXADECANOIC ACID METHYL ESTER                                   | 5.7  | 848 |
| BUTYLATED HYDROXYTOLUENE, DERIVATIVE                             | 3.7  | 799 |
| INOSITOL, CHIRO                                                  | 3.1  | 889 |

|                                               |      |     |
|-----------------------------------------------|------|-----|
| INOSITOL, MYO                                 | 1.3  | 922 |
| INOSITOL, SCYLLO                              | 6.0  | 879 |
| INOSITOL-PHOSPHATE                            | 10.6 | 893 |
| BETA-MANNOSYLGLYCERATE                        | 5.2  | 869 |
| 1-MONOSTEAROYLGLYCEROL                        | 22.2 | 896 |
| 1-MYRISTOYLGLYCEROL                           | 14.0 | 877 |
| OCTADECADIENOIC ACID METHYL ESTER, 9,12-(Z,Z) | 6.7  | 813 |
| 1-PALMITOYL-SN-GLYCERO-3-PHOSPHOCHOLINE       | 8.2  | 868 |
| PHOSPHATE (PHOSPHATE-FRAGMENT)                | 2.5  | 952 |
| 5,6-DIHYDROURACIL                             | 3.8  | 953 |
| UREA                                          | 4.8  | 958 |

---

<sup>a</sup>RSD%, calculated relative standard deviation percent for the quantified metabolite in QC samples.

<sup>b</sup>NIST match factor, numeric value (1-999) indicating the similarity of the resolved spectrum to the library spectrum.

\*pharmaceutical drug
